# Supplementary material for: Activation of the ROS/CncC Signaling Pathway Regulates Cytochrome P450 CYP4BQ1 Responsible for (+)-α-Pinene Tolerance in Dendroctonus armandi
Source: MDPI journal article supplement (doi:10.3390/ijms231911578), 2022-09-30
Supplement: s1 [file s1]

### Supplementary Material

**Table S1** Primer sequences used in the research

|                | Sequence (5' → 3')                                                   |                                                                      | purpose      |
|----------------|----------------------------------------------------------------------|----------------------------------------------------------------------|--------------|
|                | Forward                                                              | Reverse                                                              |              |
| <i>CYP4BQ1</i> | CGACGATGGCACTAAGAGGA<br>taatacgactcactatagggGCAAGCAAGTAGACA<br>AGGAT | GAAACTAATGGCTGAAGCTG<br>taatacgactcactatagggCAGTAGCA<br>AGTCAAGAAAGG | qPCR<br>RNAi |
| <i>CYP4BQ3</i> | AGTGGGGGCGAAGAGTAAAA                                                 | CGCAAACTAAGGGCTGAAG                                                  | qPCR         |
| <i>CYP4BG4</i> | CTCTGGTCTACTCCCTGTCT                                                 | AGCATTTTCATAATTTTCCT                                                 | qPCR         |
| <i>CYP4BR4</i> | CATCCGCTATTCTTCCGCTT                                                 | CCCTGTAGGTTTCGCTTCTAA                                                | qPCR         |
| <i>CncC</i>    | CACTCAACAATGACGACGGT<br>taatacgactcactatagggATTGGAGACGATTTCG<br>ATAT | CCAAGGAGAAGCCCAGATCC<br>taatacgactcactatagggGTTCACTGC<br>TGTTTGTTAGG | qPCR<br>RNAi |
| <i>Keap1</i>   | AATACAGATACATGGACGGA                                                 | GATGAAGATGAACAAGGAGA                                                 | qPCR         |
| <i>Maf</i>     | TTGGTCAGCATCTCTGTTCG                                                 | GCCATTCTTGCGTCTTTTCG                                                 | qPCR         |
| <i>GFP</i>     | taatacgactcactatagggATGGTGTTCATGCTT<br>TTCA                          | taatacgactcactatagggCTCTCTTTTC<br>GTTGGGGTCT                         | RNAi         |

Note: T7 promoter sequences in the dsRNA synthesis primers were indicated in lowercase letters.

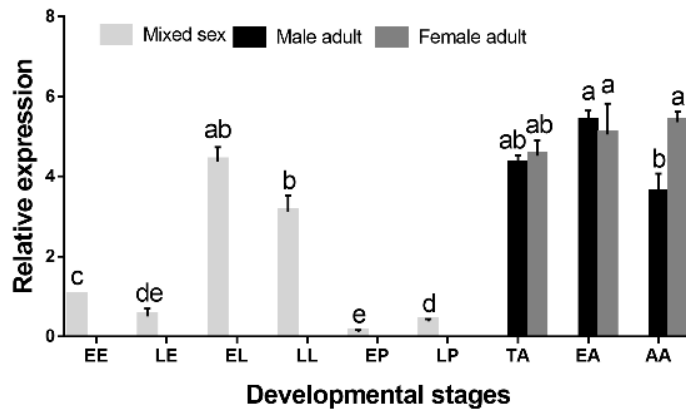

**Figure S1.** Relative mRNA expression levels of *CYP4BQ1* in different developmental stages of *D. armandi*. The relative expression levels were normalized with  $\beta$ -actin and

*CYP4G55*. Different lowercase letters indicate significant differences at  $P < 0.05$ . (ANOVA, Turkey test). All values are mean  $\pm$  SE,  $n = 3$ . EE, early egg; LE, late egg; EL, early larvae; LL, late larvae; EP, early pupae; LP, late pupae; TA, teneral adult; EA, emerged adult; AA, attacking adult.

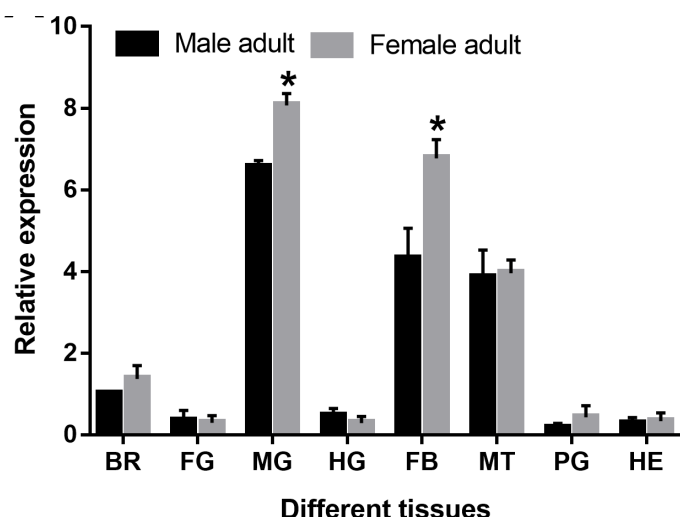

**Figure S2.** Relative expression levels of emerged adults of *CYP4BQ1* in different tissues of *D. armandi*. The relative expression levels were normalized with  $\beta$ -actin and *CYP4G55*. The asterisk indicates a significant difference between female and male expression levels (\* $P < 0.05$ , independent Student's Test). All values are mean  $\pm$  SE,  $n = 3$ . BR, brain; FG, foregut; MG, midgut; HG, hindgut; FB, fat body; MT, Malpighian tubules; PG, pheromone gland; HE, hemolymph.

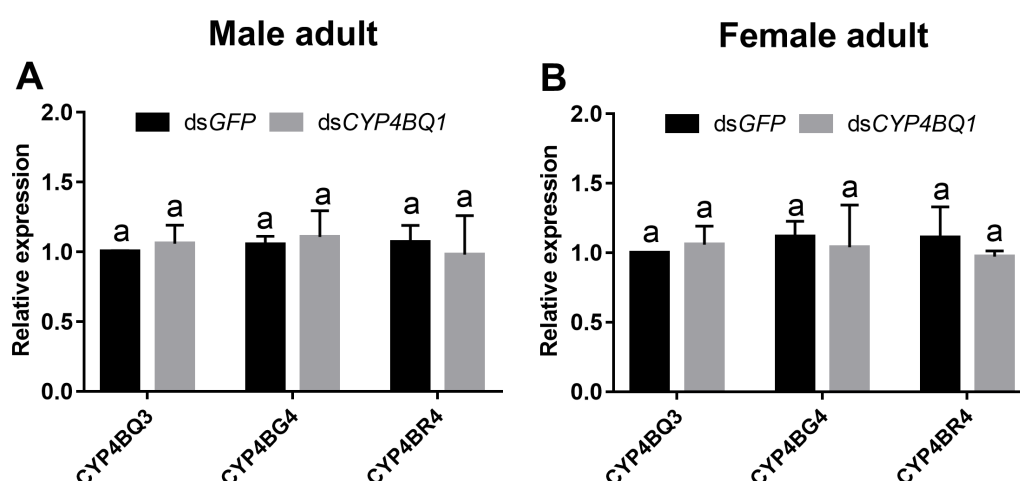

**Figure S3.** Relative expression levels of three CYP4B subfamily genes (*CYP4BQ3*, *CYP4BG4* and *CYP4BR4*) in *D. armandi* emerged male (A) and female (B) adults after injected dsRNA at 72h. The relative expression levels were normalized with  $\beta$ -actin and *CYP4G55*. Different letters indicate significant differences at  $P < 0.05$ . All values are mean  $\pm$  SE,  $n = 3$ .
